# Supplementary material for: β2-Adrenergic receptor promoter haplotype influences the severity of acute viral respiratory tract infection during infancy: a prospective cohort study
Source: PubMed Central journal article supplement (PMC4570703; doi:10.1186/s12881-015-0229-3), 2015-09-14

Caucasian

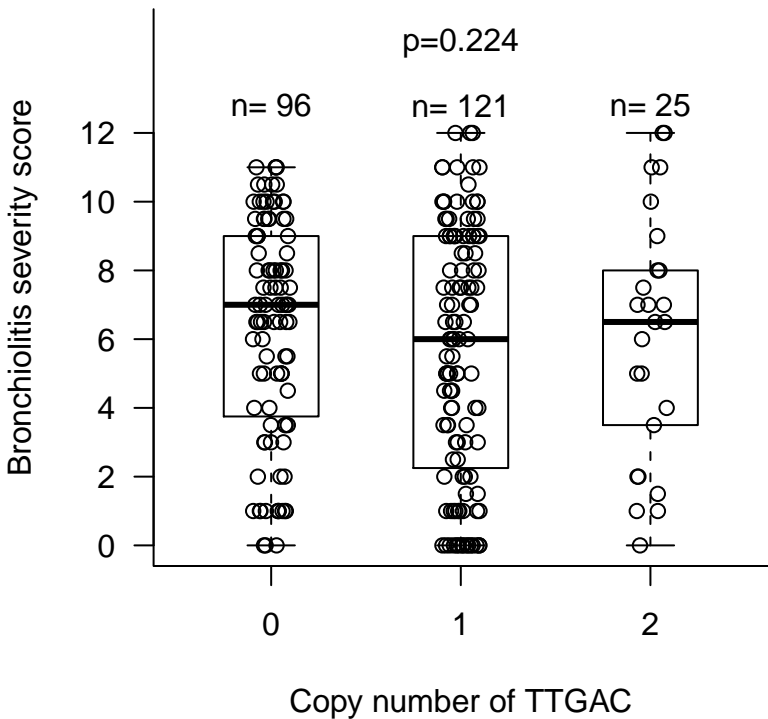

African American

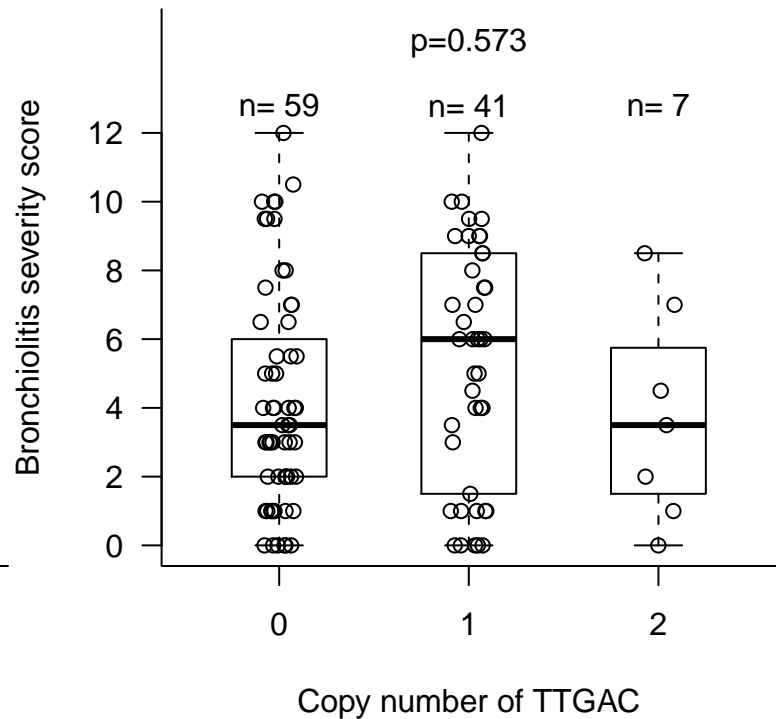

Supplement: 12881_2015_229_MOESM5_ESM.pdf [file 12881_2015_229_MOESM5_ESM.pdf]
